# Supplementary material for: Evaluation of phylogenetic footprint discovery for predicting bacterial cis-regulatory elements and revealing their evolution
Source: Springer Nature journal article supplement (doi:10.1186/1471-2105-9-37), 2008-01-23
Supplement: 12859_2007_2022_MOESM3_ESM.pdf [file 12859_2007_2022_MOESM3_ESM.pdf]

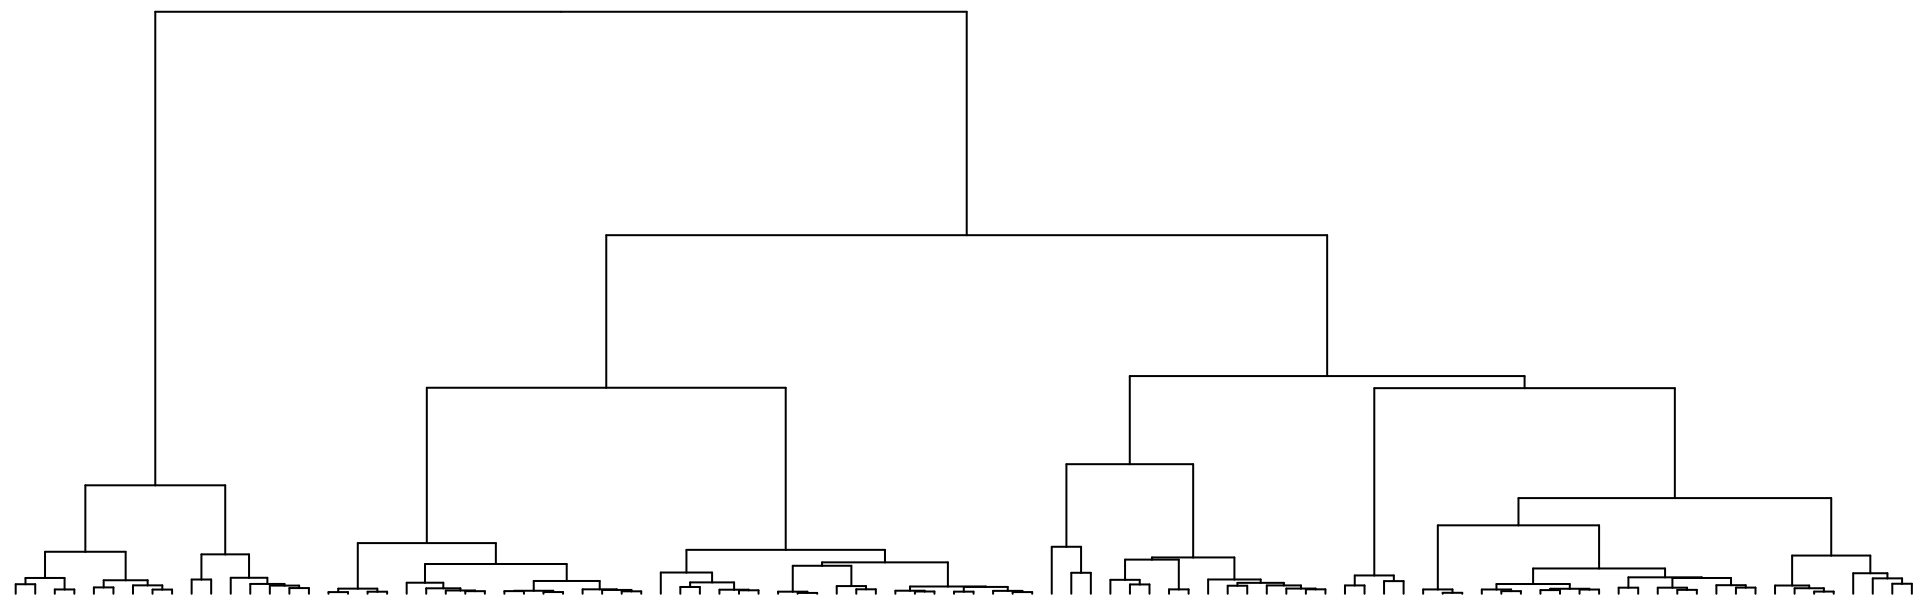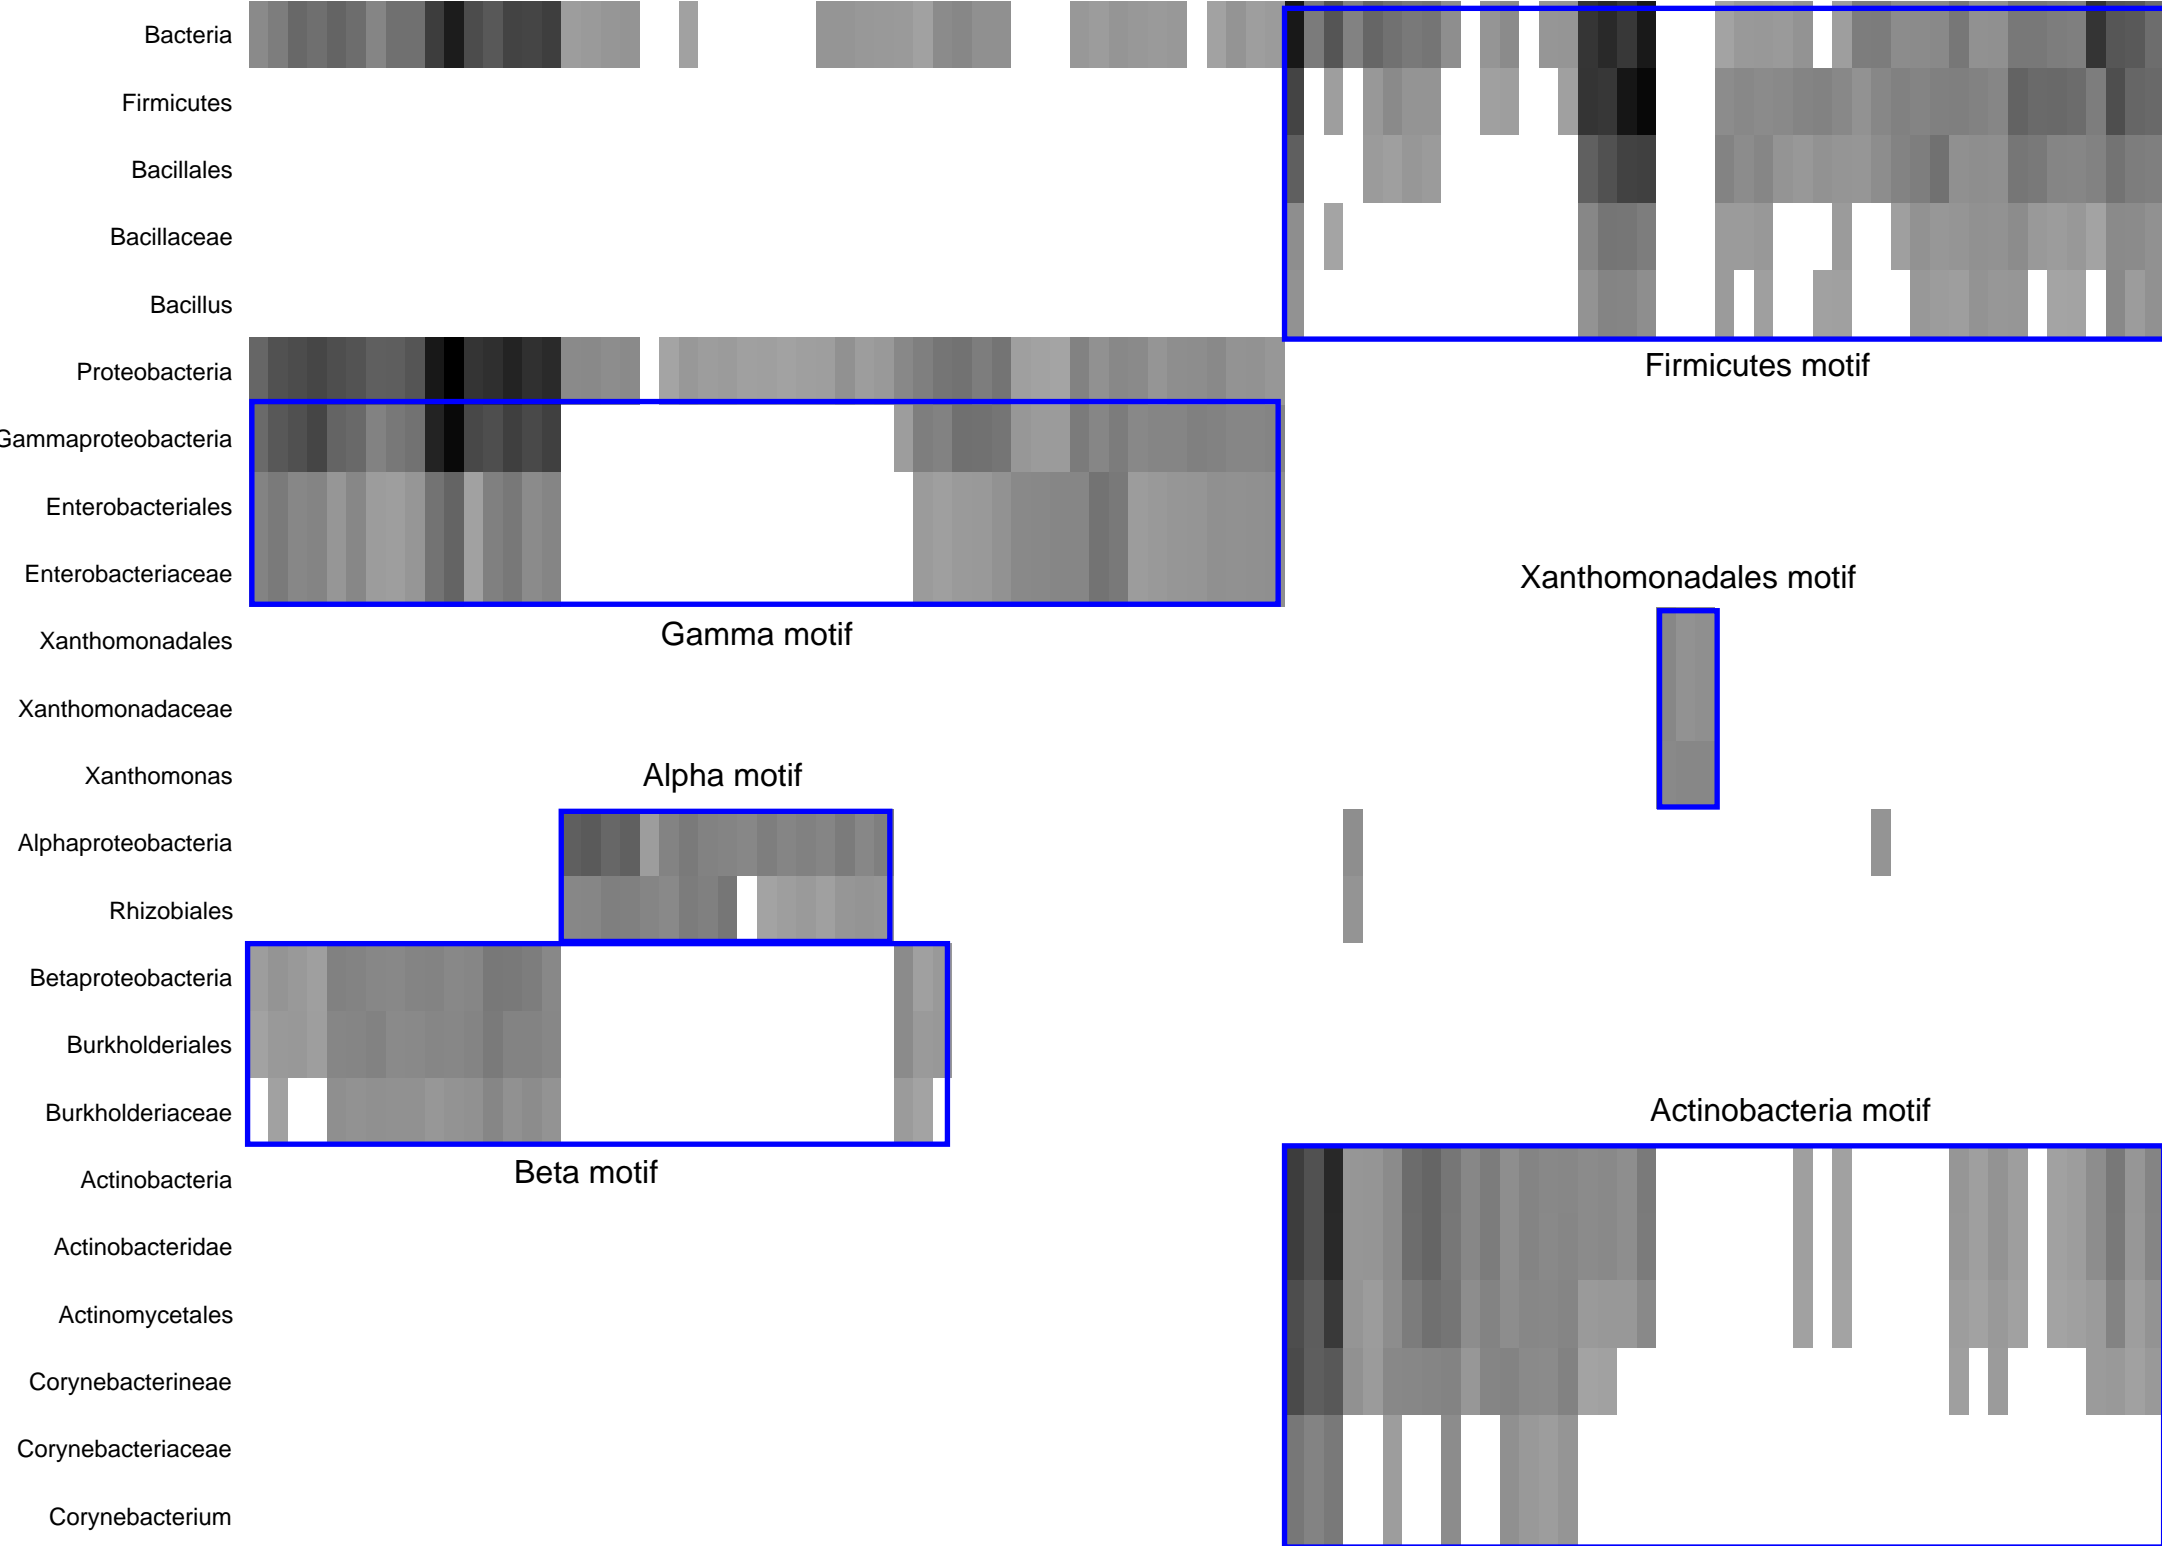

Firmicutes motif

Xanthomonadales motif

Gamma motif

Alpha motif

Beta motif

Actinobacteria motif

actan(5)tcg  
 aactn(2)atg  
 aactn(6)tcg  
 aactn(2)igt  
 caan(7)thc  
 caan(6)ttg  
 aactn(6)ttc  
 caan(6)ttc  
 caan(8)tcg  
 aactn(0)aac  
 caan(3)thc  
 caan(1)jaca  
 cgan(1)caaa  
 cian(1)haa  
 cian(0)cia  
 taon(0)haa  
 aactn(4)gtt  
 aactn(5)ttc  
 aactn(4)ttc  
 aactn(3)igt  
 aactn(1)gaa  
 aactn(4)cgaa  
 aactn(1)igt  
 aactn(1)tcg  
 catn(5)cgaa  
 gaaan(8)cgaa  
 tton(0)gaa  
 aactn(7)cgaa  
 aactn(6)cgaa  
 aactn(0)ttc  
 aactn(1)atg  
 gaaan(0)jac  
 gith(0)cgaa  
 tagn(1)jaca  
 cgan(0)jaca  
 cctn(11)ceag  
 cign(4)fac  
 cctn(10)jaca  
 latn(0)ata  
 gian(1)ata  
 cign(3)gta  
 atan(4)caag  
 cign(5)ata  
 gian(2)ttc  
 gian(3)ata  
 latn(2)ata  
 ccon(10)fac  
 cctn(8)ata  
 atan(7)agg  
 atan(0)fac  
 cign(3)ata  
 atan(2)caag  
 atan(5)ata  
 actn(2)ata  
 actn(9)fac  
 ggan(0)jaca  
 aactn(8)ata  
 aactn(9)ata  
 ggan(10)ata  
 aactn(6)ata  
 aactn(5)ata  
 ggan(8)ata  
 ggan(9)ata  
 aactn(1)ata  
 aactn(2)ata  
 ggan(4)ata  
 ggan(3)ata  
 ggan(0)ita  
 aactn(7)aac  
 aactn(6)ata  
 aactn(8)aac  
 aactn(7)gaa  
 aactn(1)ccag  
 igt(8)ata  
 cign(8)ttc  
 atan(0)caag  
 actn(10)ata  
 cign(9)ata  
 cign(10)caag  
 actn(0)gta  
 actn(6)ata  
 actn(1)tat  
 cign(7)ata  
 gian(7)ata  
 cign(1)ata  
 atan(6)caag  
 latn(0)ata  
 atan(1)ata
