# Supplementary material for: Evaluation of phylogenetic footprint discovery for predicting bacterial cis-regulatory elements and revealing their evolution
Source: Springer Nature journal article supplement (doi:10.1186/1471-2105-9-37), 2008-01-23

**A****Pattern significance  
(Actinobacteria vs Firmicutes)**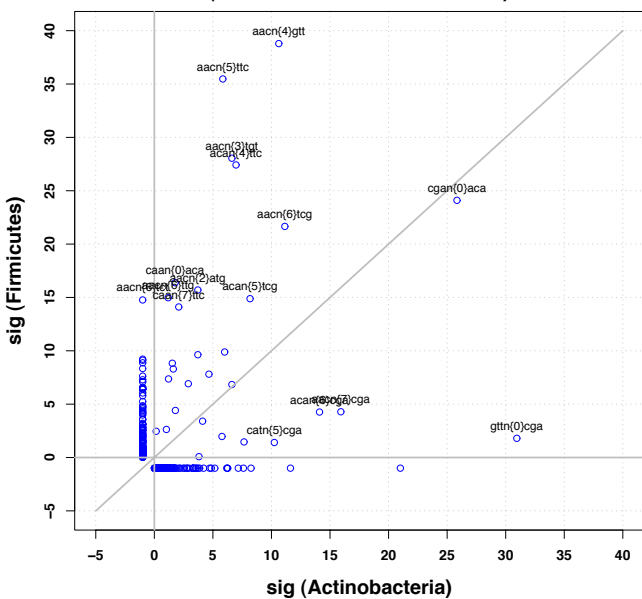**B**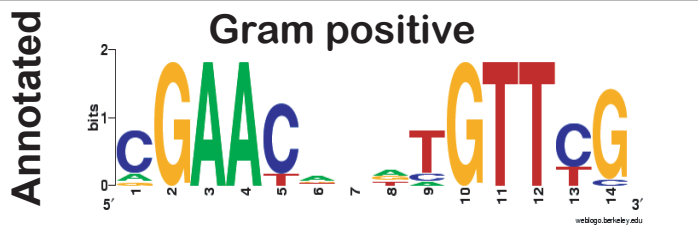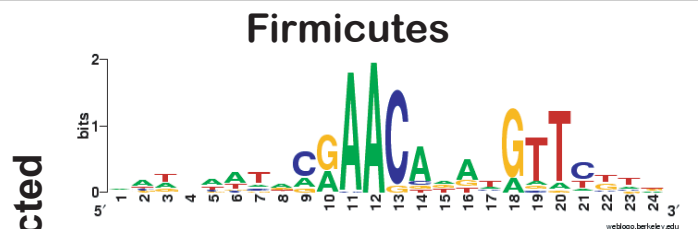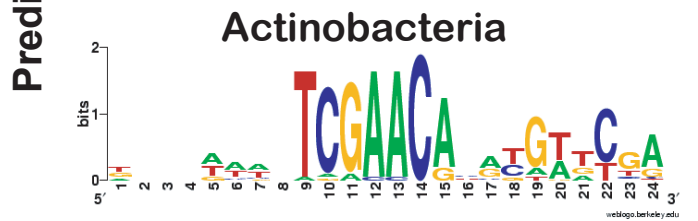**C**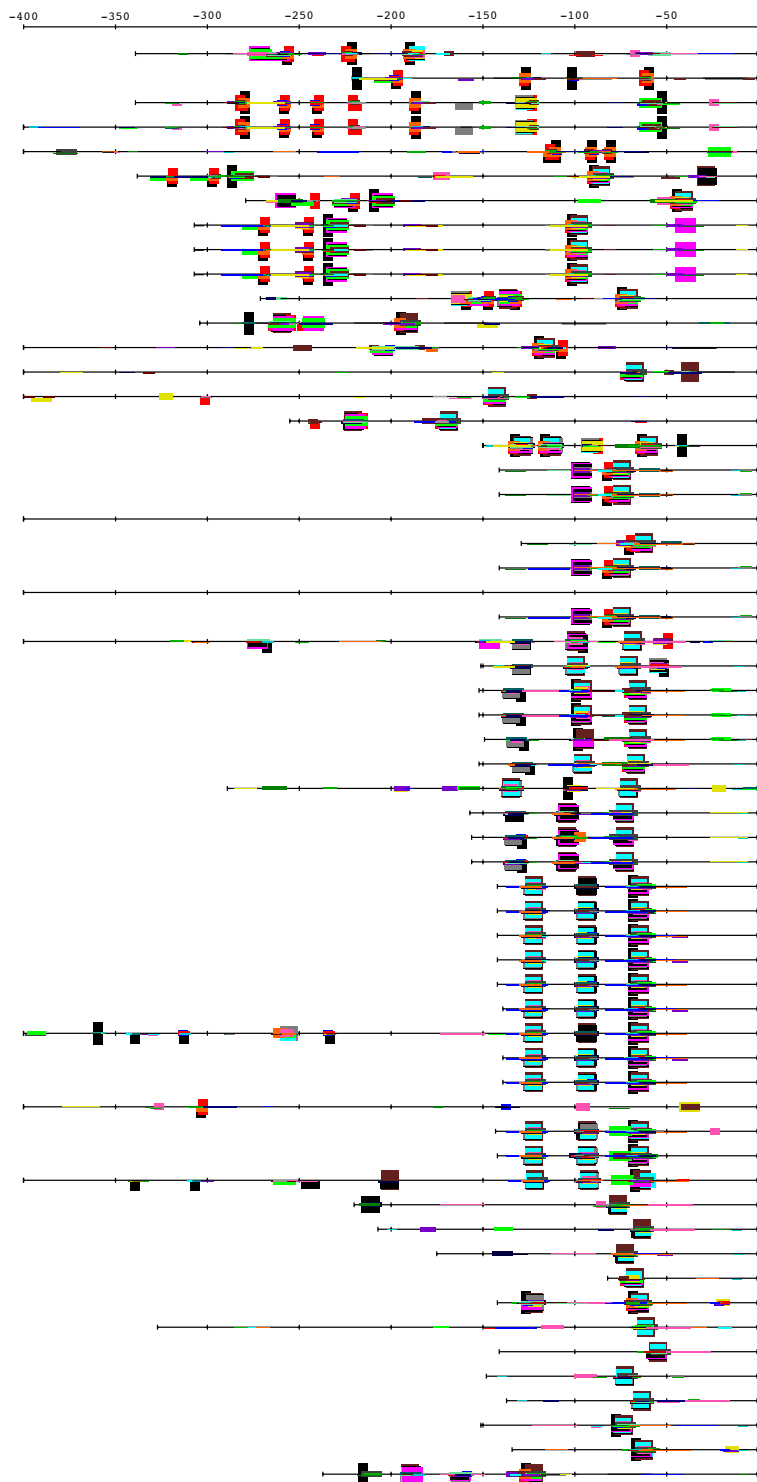

Supplement: 12859_2007_2022_MOESM12_ESM.pdf [file 12859_2007_2022_MOESM12_ESM.pdf]
